# Supplementary material for: Yolk-structured multifunctional up-conversion nanoparticles for synergistic photodynamic–sonodynamic antibacterial resistance therapy
Source: Royal Society of Chemistry journal article supplement (doi:10.1039/c7bm00030h), 2017-01-01
Supplement: c7bm00030h1.pdf [file c7bm00030h1.pdf]

# **Yolk-structured Multifunctional Up-conversion Nanoparticles**

## **For Synergistic Photodynamic-Sonodynamic Antibacterial**

### **Resistance Therapy**

Feiya Xu,<sup>a</sup> Min Hu,<sup>a, d\*</sup> Chengcheng Liu,<sup>b\*</sup> Seok Ki Choi<sup>c</sup>

<sup>a</sup>Department of Chemistry, School of Science, Xi'an Jiaotong University, Xi'an 710049, China

<sup>b</sup>Department of Pathogenic Microbiology & Immunology, School of Basic Medical Sciences, Xi'an Jiaotong University Health Science Center, Xi'an 710061, China

<sup>c</sup>Department of Internal Medicine, Michigan Nanotechnology Institute for Medicine and Biological Sciences University of Michigan, Ann Arbor, MI 48109-1055, U.S.A

<sup>d</sup>State Key Laboratory of Chemo/Biosensing and Chemometrics, Hunan University, Changsha 410082, P.R.China

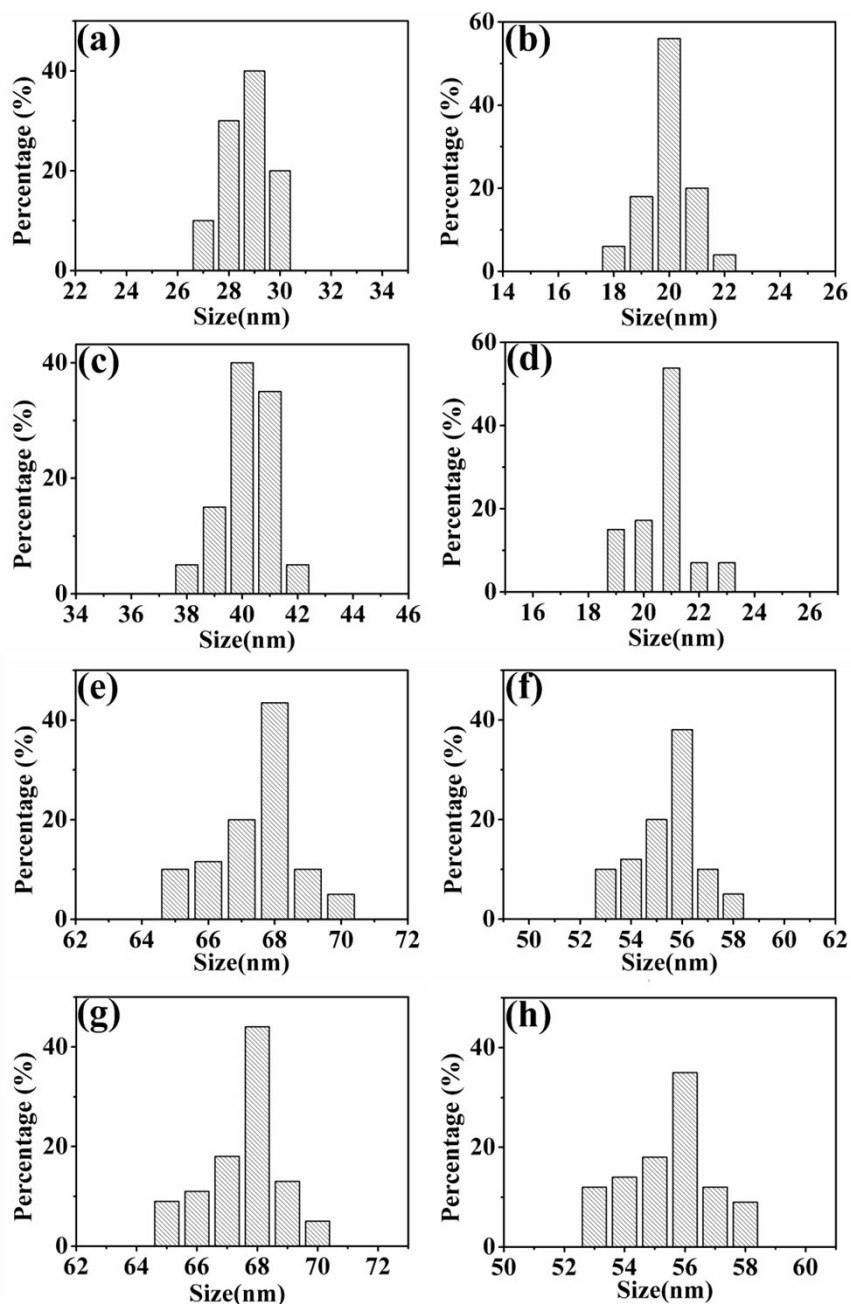

**Fig. S1.** Size distributions of the (a, b) NaYF<sub>4</sub>: Yb, Er; (c, d) NaYF<sub>4</sub>: Yb, Er @ NaGdF<sub>4</sub>: Nd; (e, f) UCNP@SiO<sub>2</sub>-RB; (g, h) yolk-structured UCNP@SiO<sub>2</sub>-RB and size of (a, c, e, g) was in length and (b, d, f, h) was in width.

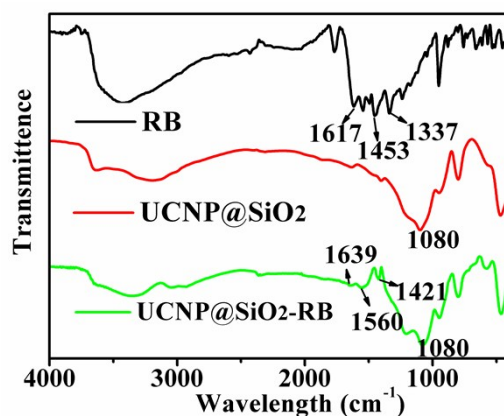

**Fig. S2.** Fourier-transform infrared (FTIR) spectra of RB, UCNP@SiO<sub>2</sub> and UCNP@SiO<sub>2</sub>-RB.

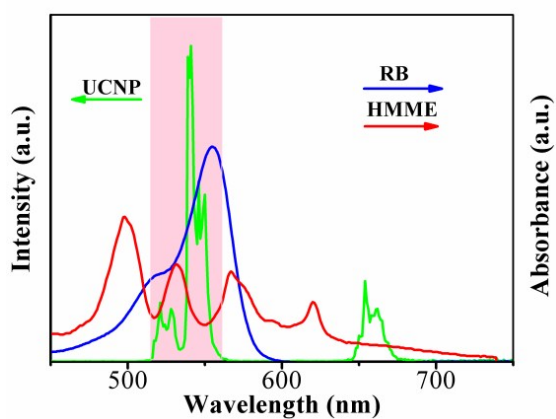

**Fig. S3.** UC emission spectrum of the UCNP NPs in cyclohexane (green line), and absorption spectra of RB molecules (blue line) and HMME (red line) in Deionized water.

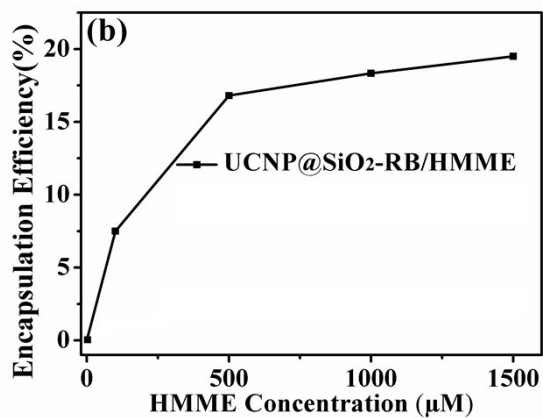

**Fig. S4.** The drug encapsulation efficiency (%) of HMME as a function of HMME concentration.

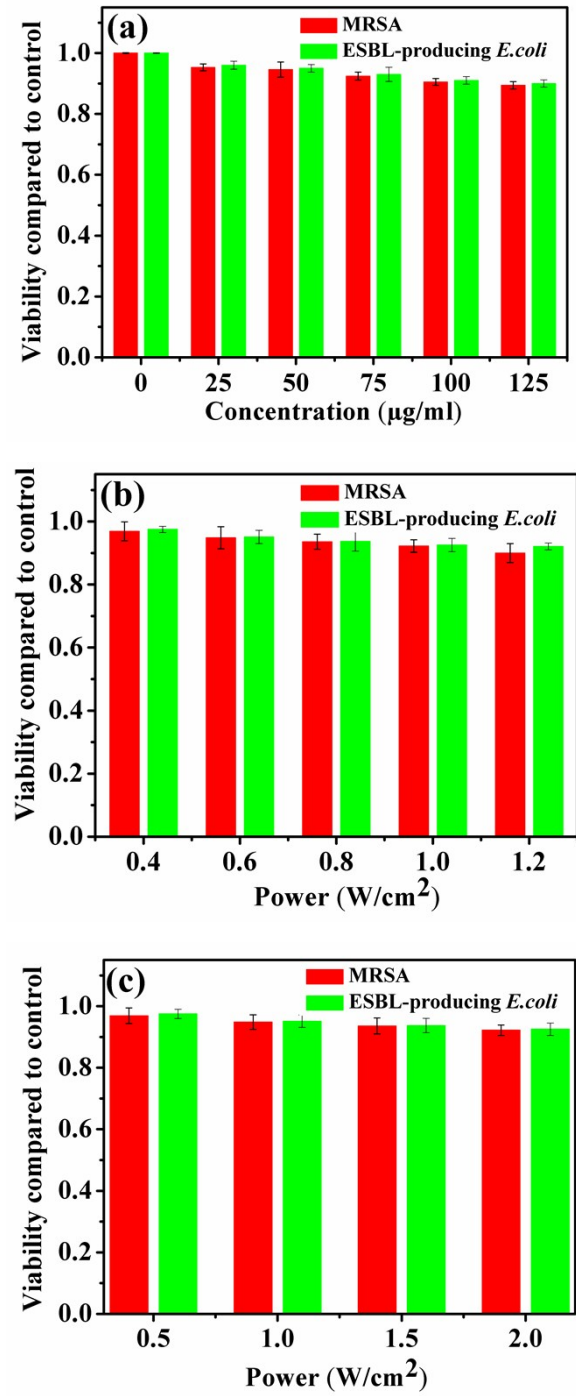

**Fig. S5.** Cytotoxicity assay of MRSA and ESBL-producing *E.coli* treated with (a) UCNP@SiO<sub>2</sub>-RB/HMME at different concentrations (no irradiation); (b) 980 nm laser for 30min; (c) ultrasonication for 10min.

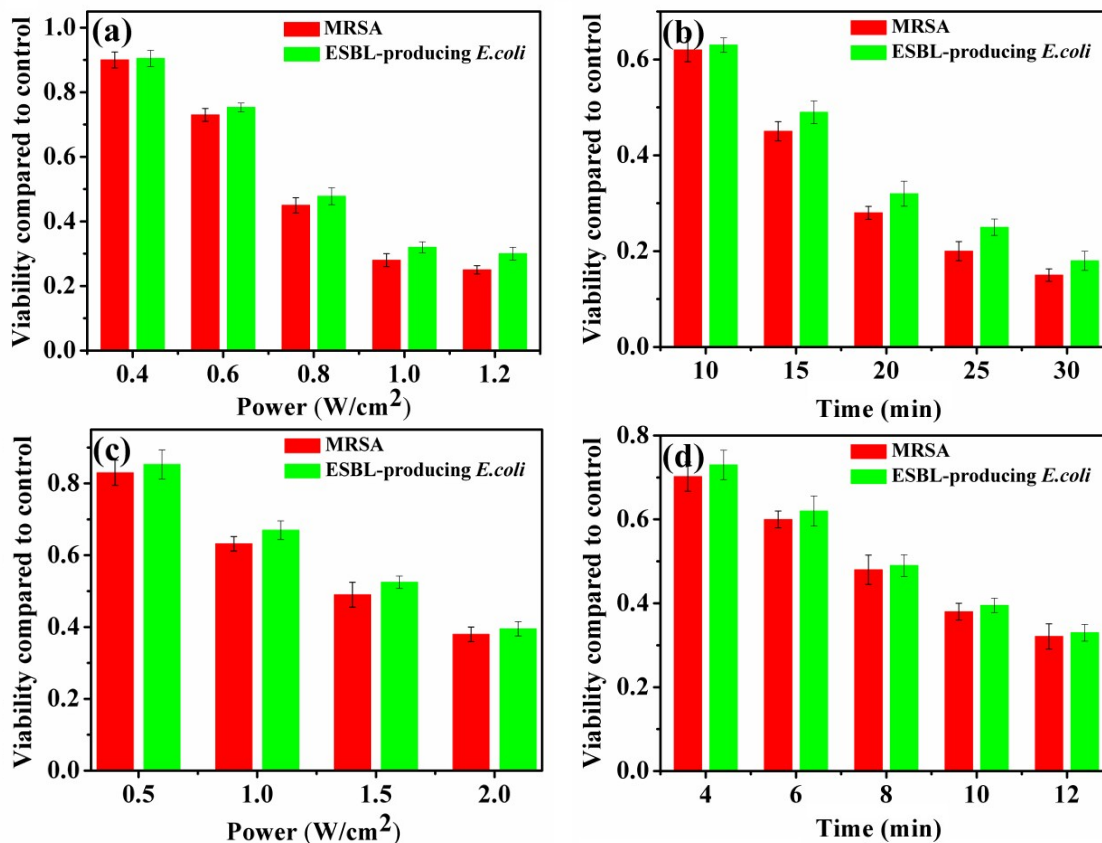

**Fig. S6.** Cytotoxicity assay of MRSA and ESBL-producing *E.coli* incubated with 100μg/ml UCNP@SiO<sub>2</sub>-RB/HMME under 980nm laser with (a) different power intensity (irradiation time = 30 min); (b) different illumination time (1.0 W/cm<sup>2</sup>); with ultrasonication for (c) different power intensity (10 min);(d) different illumination time (2.0 W/cm<sup>2</sup>).
